# Supplementary material
Source: HighWire-hosted journal article supplement (https://bmjophth.bmj.com/content/3/1/e000114)
Supplement: inline-supplementary-material-3 [file inline-supplementary-material-3.docx]

Supplemental Table 1: Baseline and 3-Year mean (SD) Visual Function Questionnaire-25 scores for subjects who completed the study

| Variable | Baseline  ≥ 80% Adherence | Baseline  < 80% Adherence | Baseline  Standardized Mean Difference | 3-Year  ≥ 80% Adherence | 3-Year  < 80% Adherence | 3-Year  Standardized Mean Difference |
| --- | --- | --- | --- | --- | --- | --- |
| General Vision | 68.51(17.06) | 69.33(16.68) | -0.05 | 72.34(17.96) | 66.67(17.99) | 0.32 |
| Color Vision | 82.39(25.05) | 82.14(28.47) | 0.01 | 81.91(26.94) | 75.00(35.36) | 0.22 |
| Peripheral Vision | 69.68(26.03) | 70.00(28.66) | -0.01 | 77.66(27.20) | 66.67(27.82) | 0.40 |
| Ocular Pain | 76.86(23.02) | 75.00(18.30) | 0.09 | 83.24(18.66) | 72.50(19.02) | 0.57 |
| Near Activities | 71.72(23.47) | 69.44(25.72) | 0.09 | 76.60(25.87) | 70.56(19.38) | 0.26 |
| Distance Activities | 75.98(25.94) | 76.11(21.33) | -0.01 | 77.13(25.45) | 75.83(21.49) | 0.05 |
| Social Functioning | 85.37(20.24) | 80.83(25.82) | 0.20 | 83.51(20.87) | 80.83(27.90) | 0.11 |
| Mental Health | 72.74(28.08) | 70.00(30.55) | 0.09 | 69.28(32.00) | 67.50(26.75) | 0.06 |
| Role Difficulties | 70.74(28.58) | 75.83(30.79) | -0.17 | 71.28(32.44) | 70.83(29.38) | 0.01 |
| Dependency | 83.33(24.14) | 80.56(32.07) | 0.10 | 79.08(30.93) | 77.22(32.19) | 0.06 |
| Driving | 63.92(34.34) | 67.71(29.42) | -0.12 | 63.89(29.94) | 67.71(31.74) | -0.12 |
| Composite | 74.48(19.65) | 73.57(22.22) | 0.04 | 75.97(21.82) | 71.68(21.93) | 0.20 |
| General Health | 46.28(22.10) | 40.00(22.76) | 0.28 | 53.19(20.60) | 48.33(27.49) | 0.20 |

Supplemental Table 2: Visual field progression and intensification of therapy stratified by baseline percent adherence

|  | ≥ 80% Adherence  N=47(%) | < 80%Adherence  N=15 (%) | Fisher’s exact test p-value |
| --- | --- | --- | --- |
| Visual Field Progression | 11 (23.4%) | 5 (33.3%) | 0.50 |
| No Visual Field Progression | 36 (76.6%) | 10 (66.6%) |  |
| Any Intensification of therapy | 31 (66.0%) | 11 (73.3%) | 0.75 |
| No Intensification of therapy | 16 (34.0%) | 4 (26.7%) |  |

Supplemental Table 3: Visual field progression stratified by baseline percent adherence

|  | ≥ 80% Adherence  N = 47 | < 80% Adherence  N = 15 | Fisher’s Exact Test P-Value |
| --- | --- | --- | --- |
| Visual Field Progression | 11 (23.4%) | 5 (33.3%) | 0.50 |
| No Visual Field Progression | 36 (76.6%) | 10 (66.6%) |  |

|  | ≥ 70% Adherence  N = 49 | < 70% Adherence  N = 13 | Fisher’s Exact Test P-Value |
| --- | --- | --- | --- |
| Visual Field Progression | 11 (22.4%) | 5 (38.5%) | 0.29 |
| No Visual Field Progression | 38 (77.6%) | 8 (61.5%) |  |

|  | ≥ 60% Adherence  N = 53 | < 60% Adherence  N = 9 | Fisher’s Exact Test P-Value |
| --- | --- | --- | --- |
| Visual Field Progression | 12 (22.6%) | 4 (44.4%) | 0.22 |
| No Visual Field Progression | 41 (77.4%) | 5 (55.6%) |  |

|  | ≥ 50% Adherence  N = 55 | < 50% Adherence  N = 7 | Fisher’s Exact Test P-Value |
| --- | --- | --- | --- |
| Visual Field Progression | 14 (25.5%) | 2 (28.6%) | 1.00 |
| No Visual Field Progression | 41 (74.5%) | 5 (71.4%) |  |

Supplemental Figure 1: Scatterplot of Visual Function Questionnaire composite scores by

percent medication adherence at baseline

Supplemental Figure 2: Box plot of Visual Function Questionnaire composite score by

dichotomized percent medication adherence at baseline
